# Supplementary material for: Overall equipment effectiveness, efficiency and slide review analysis of high-end hematology analyzers
Source: PubMed Central journal article supplement (PMC9117814; doi:10.1016/j.plabm.2022.e00275), 2022-04-18
Supplement: mmc1.pdf [file mmc1.pdf]

# Slide Review Criteria

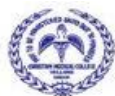

|                      |                |
|----------------------|----------------|
| <b>Document Name</b> | CMCTMIH – R 37 |
| <b>Version</b>       | 3.0            |

| S#                   | Parameters                             | Rules                                                                                                                | comments        |
|----------------------|----------------------------------------|----------------------------------------------------------------------------------------------------------------------|-----------------|
| 1                    | Platelet                               | < 50000                                                                                                              | slide review    |
| 2                    | Platelet                               | 50000-100000 and MPV >10.5                                                                                           | no slide review |
| 3                    | Haemoglobin                            | <6gm (>20gm/dL in case of neonates)                                                                                  | slide review    |
| 4                    | MCV                                    | <60 >110                                                                                                             | slide review    |
| 5                    | MCHC                                   | >35.0                                                                                                                | slide review    |
| 6                    | RDW                                    | >25.0                                                                                                                | slide review    |
| 7                    | RDW                                    | Excludes OGpatient,dimorphic                                                                                         |                 |
| 8                    | Retic                                  | > 5% #±0.1                                                                                                           | slide review    |
| <b>Differential</b>  |                                        |                                                                                                                      |                 |
| 9                    | Neutrophil                             | Any value                                                                                                            | no slide review |
| 10                   | Eosinophil                             | Any value                                                                                                            | no slide review |
| 11                   | Lymphocyte                             | Adult >50 child >60 till 15 yrs (No slide review if absolute number of lymphocytes# < 5000)                          | slide review    |
| 12                   | Monocyte                               | >15% (If histogram reflects monocytosis), Exclude slide review if patient on radiation and absolute number < 1000    | slide review    |
| 13                   | NRBC                                   | >2                                                                                                                   | slide review    |
| <b>Suspect flags</b> |                                        |                                                                                                                      |                 |
| 14                   | Immature granulocytes (IG)/ Shift left | Only with NRBC's                                                                                                     | slide review    |
| 15                   | Variant lymphocyte                     | If significant numbers                                                                                               | slide review    |
| 16                   | Ne blast                               |                                                                                                                      | slide review    |
| 17                   | Mono blast                             |                                                                                                                      | slide review    |
| 18                   | Lympho blast                           |                                                                                                                      | slide review    |
| 19                   | Less than 500 cells                    | No differential (Do manual only for the first time, from the next time onward validate with a message "DC not done") |                 |

|                                                                                                                |                                                                                                              |                                                                                                               |               |               |
|----------------------------------------------------------------------------------------------------------------|--------------------------------------------------------------------------------------------------------------|---------------------------------------------------------------------------------------------------------------|---------------|---------------|
| <b>Technical review</b><br> | <b>Quality Review</b><br> | <b>Authorized By</b><br> | <b>Issued</b> | <b>Review</b> |
| <b>Section in charge</b>                                                                                       | <b>Quality Manager</b>                                                                                       | <b>HOD</b>                                                                                                    | 5/15/2019     | 5/15/2019     |
