# Supplementary material for: Overall equipment effectiveness, efficiency and slide review analysis of high-end hematology analyzers
Source: PubMed Central journal article supplement (PMC9117814; doi:10.1016/j.plabm.2022.e00275), 2022-04-18
Supplement: mmc2.pdf [file mmc2.pdf]

## Software version of all analyzers:

|   | Analyzers        | Vresion  |
|---|------------------|----------|
| a | Sysmex XN900(10) | 22.11-00 |
| b | Horiba YH2500    | V1.3.0   |
| c | DxH 800          | 3.9.0.31 |
| d | DxH 900          | 1.1.0.96 |
